# Supplementary material for: Human Primary Bone Marrow Mesenchymal Stromal Cells and Their in vitro Progenies Display Distinct Transcriptional Profile Signatures
Source: PubMed Central journal article supplement (PMC5583257; doi:10.1038/s41598-017-09449-x), 2017-09-04
Supplement: 41598_2017_9449_MOESM1_ESM.pdf [file 41598_2017_9449_MOESM1_ESM.pdf]

**Human Primary Bone Marrow Mesenchymal Stromal Cells and Their *in vitro*  
Progenies Display Distinct Transcriptional Profile Signatures**

Roshanak Ghazanfari,<sup>1,2</sup> Dimitra Zacharaki,<sup>1,2</sup> Hongzhe Li,<sup>1,2</sup> Hooi Ching Lim,<sup>1,2</sup> Shamit Soneji,<sup>2</sup>  
and Stefan Scheduling<sup>1,2,3</sup>

<sup>1</sup> Lund Stem Cell Center, University of Lund, Lund, Sweden

<sup>2</sup> Division of Molecular Hematology, Department of Laboratory Medicine, University of Lund,  
Lund, Sweden

<sup>3</sup> Department of Hematology, Skåne University Hospital Lund, Sweden

## Supplementary Table S1: List of the genes in clusters 3 and 5\*

## Cluster 3

|         |          |          |           |          |          |          |            |
|---------|----------|----------|-----------|----------|----------|----------|------------|
| CTSC    | TNFRSF1B | STOM     | APBB1IP   | HLA-E    | FOSB     | PSME1    | SLC7A2     |
| APOL3   | HLA-DRB6 | ZFP36    | GLDN      | ECGF1    | AIM1     | HLA-DRB1 | PAIP2      |
| MRPS31  | PSAP     | BST2     | NUP88     | C7orf11  | LIPA     | EXOSC10  | CCDC130    |
| CSTF2   | TBP      | SNRNP40  | APOE      | HLA-B    | SDHA     | HNRNP    | CYBA       |
| HLA-F   | B2M      | PARP12   | HIST2H2AC | NXF1     | ITM2B    | LARP4    | PSMB9      |
| NUP62   | SLC44A1  | C1QTNF1  | OLFML2B   | IFI16    | DUSP1    | PSMB8    | HMGB3      |
| PPT1    | EIF2B5   | FAU      | CITED4    | GTPBP6   | TMEM218  | EIF4A3   | PTPRA      |
| HLA-H   | NOP58    | FOS      | STK11IP   | FLJ37786 | NDRG1    | SERPING1 | EML3       |
| OR6C76  | MFSD1    | RFX5     | HLX       | MAPKAPK2 | PPM1G    | HCP5     | DDX39      |
| WDR86   | HACL1    | DPP4     | CD68      | SEPP1    | RGS2     | FAM96A   | MAPKAPK3   |
| C22orf9 | ARMET    | C11orf73 | NAV2      | NPHS2    | VCAM1    | ZC3H11B  | SNRPB      |
| EGR1    | PCID2    | OAS2     | PSME2     | ALPL     | GSDMD    | SLC15A3  | HLA-G      |
| PDGFRA  | PTK6     | ADD3     | PIM2      | S1PR3    | RHOBTB1  | KCNJ3    | FLJ42842   |
| SMAP2   | CDH7     | LINGO4   | UCLH5IP   | CMTM7    | SUPT7L   | TMEM30A  | HIST2H2AA4 |
| LITRK4  | GMDS     | CTSC     | TCEB3C    | GRWD1    | C19orf48 | UNG      | MIR658     |
| TMEM69  | HSDL2    | PPARG    | FABP5L2   | PCCA     | RIBC1    | PTPN12   | DNAJA1     |

## Cluster 5

|          |          |          |          |           |          |          |           |          |          |
|----------|----------|----------|----------|-----------|----------|----------|-----------|----------|----------|
| DKK3     | CSRP1    | COL8A1   | LDLR     | LIMS2     | STC2     | ASNS     | POSTN     | HOMER2   | LOX      |
| ITGA11   | PDE7B    | PSAT1    | ASNS     | COL12A1   | TAGLN    | KRT7     | HAPLN1    | LOXL1    | LMCD1    |
| COL1A2   | DACT1    | HAS1     | MTHFD2   | CRYAB     | FLNC     | COL5A2   | CRABP2    | DSTN     | CRIP2    |
| MFAP2    | CDH2     | CD151    | SDC2     | CNN1      | SLC1A5   | WSB2     | PPP1R3C   | PLAA     | IARS     |
| COL1A1   | DSTN     | FOXD1    | THBS1    | AFAP1     | DACT1    | CKB      | CARS      | THBS3    | B4GALT2  |
| COL4A1   | CALD1    | KIAA164  | TRIB3    | NUPR1     | MFAP5    | MYL9     | MTHFD2    | HAPLN1   | PYCR1    |
| NDUFA10  | DAG1     | C11orf41 | MTCH1    | MYL6      | FRMD6    | TUBB2B   | LBH       | HSPB7    | RAB23    |
| MYL6     | PALM     | MID1     | SLC16A5  | POSTN     | TAGLN    | CBS      | C16orf7   | HCFC1R1  | FLRT2    |
| COL5A1   | SPARC    | PCBD1    | DPYSL3   | TGDS      | SYT11    | C9orf3   | PHGDH     | FARP1    | ZFPL1    |
| KIAA0363 | BEND6    | PCBP4    | PEA15    | SH3BP4    | FRMD6    | LIMA1    | BCAR3     | CHST14   | ENAH     |
| CLTB     | TULP4    | MLH3     | SLC2A1   | PTPRF     | ALPK2    | NUAK1    | LOXL3     | PALLD    | TPM1     |
| ACTB     | LYPD1    | HCFC1R1  | MAP1A    | FAM69A    | LARGE    | ANXA5    | CARS      | RIMS3    | ARHGDI   |
| C5orf23  | TMEM90B  | TNS1     | TUFT1    | C1orf198  | PCK2     | FER1L3   | KCNK2     | LRSAM1   | FAT1     |
| EFS      | ATF4     | EIF1     | TP53I11  | COMP      | LMOD1    | EHD2     | SLIT3     | TRNP1    | TPM1     |
| EVL      | VLDLR    | ANXA2P1  | GALNT10  | TSPO      | TBC1D20  | RUSC2    | FLJ35258  | DACT3    | KCTD15   |
| GPBR     | TBCB     | GREM1    | KLHL9    | FKBP9L    | ESYT1    | RNH1     | UBE2D4    | SLC6A8   | MYLK     |
| SLC38A2  | CBR3     | CPA4     | MYOF     | RAB23     | ITGBL1   | NFE2L1   | NDUFB7    | PDLIM1   | ADCY4    |
| LRRC15   | FNDC1    | SNTA1    | CY5R3    | COP2      | FLNA     | CNTNAP1  | C2orf24   | FBXL7    | MATN2    |
| CABLES1  | KRT81    | HAS3     | LARGE    | UHRF1BP1  | LRRC32   | MGC42630 | MGC102966 | SCARF2   | LYPD6B   |
| ATXN2    | TMEM184B | TNK2     | ANXA2P1  | COL4A2    | NTN4     | FBXL5    | TBC1D20   | JUB      | CDC14A   |
| NTM      | GCC1     | HSPB2    | GDPD1    | FNDC1     | POFUT2   | S100A11  | C5orf53   | UNC5B    | KIFAP3   |
| LHPP     | SLC7A1   | ACLY     | SCRG1    | SLC7A5    | ZFH3     | PIP3-E   | KRT78     | POFUT2   | INHBE    |
| MYLK     | FAM180A  | SPTAN1   | ARL2     | TPM2      | STBD1    | NTM      | RNF150    | ATP6V0E2 | MEX3B    |
| SYTL2    | PENK     | TPD52L1  | PTN      | FKSG30    | NAV1     | ECM1     | PFKP      | TMUB1    | P4HA3    |
| B3GALT6  | PCK2     | C1QTNF5  | P2RX6    | SEMA4F    | CRLF1    | TMEM166  | SMPD1     | PTPRF    | ABLIM1   |
| CXXC5    | MIR889   | PPP1R14B | CALD1    | BCAS4     | GLS      | GDI1     | PIP5K1C   | PDGFC    | FUBP3    |
| GALNT1   | FSTL3    | MCAM     | KIAA0427 | ID3       | DYNLRB1  | GPR1     | C14orf78  | HSPB8    | SLC3A2   |
| ID2      | COL8A2   | LEPRE1   | ATO8     | SC4MOL    | RAP1B    | BAMBI    | CDC42EP1  | CXCR7    | ST8SIA4  |
| COL8A2   | LIMCH1   | PXDN     | C20orf30 | RBCK1     | CAP2     | THY1     | EYA2      | RHOBTB1  | RTN4     |
| TCEA2    | WARS     | LSS      | IGFBP7   | RAB11FIP2 | TTC3     | ZCCHC14  | TPD52L1   | PFN1     | BOK      |
| FAM171A1 | KCNMA1   | PARVA    | DAB2     | LMF1      | SIPA1L1  | WARS     | CREB3L2   | FBXW4    | MGC72080 |
| FLJ40504 | CTGF     | ALCAM    | ENC1     | VCL       | CTGF     | CY5R3    | COL16A1   | MYH9     | CNN2     |
| KCTD11   | CSPG4    | MYH9     | SLC1A4   | C5orf13   | MET      | TMEM47   | PRSS23    | ADM2     | NLRX1    |
| SCAND2   | GRPEL2   | SOX4     | SEC61A1  | BGN       | NUAK1    | PLS3     | ISLR      | EIF4EBP1 | CLSTN1   |
| PPAP2A   | YIF1B    | DCI      | C18orf1  | FZD2      | C7orf50  | IL11     | ZNF197    | C6orf48  | NAGK     |
| LAYN     | ABI3BP   | SORBS2   | SASH1    | SIRPA     | TP53INP2 |          |           |          |          |

\* Genes are indicated based on official gene symbol in NCBI

## Supplementary Table S2: List of the primers used for Real-Time PCR

| Name     | Forward                | Reverse               | Product size (bp) |
|----------|------------------------|-----------------------|-------------------|
| RPL11    | AAAGGTGCGGGAGTATGAGTT  | TCCAGGCCGTAGATACCAATG | 126               |
| OAS2     | ACGTGACATCCTCGATAAACTG | GAACCCATCAAGGGACTTCTG | 100               |
| FOSB     | ACCCTCTGCCGAGTCTCAAT   | GAAGGAACCGGGCATTTC    | 109               |
| SERPING1 | TGCCCATGATGAATAGCAAG   | TTCTGGGGTACCAGGATCAC  | 121               |
| ALPL     | AGCTGAACAGGAACAACGTG   | CAGCAAGAAGAAGCCTTTGG  | 98                |
| PPARG    | TGCAGGTGATCAAGAAGACG   | GAAGGGAAATGTTGGCAGTG  | 112               |

## Supplementary Figure S1

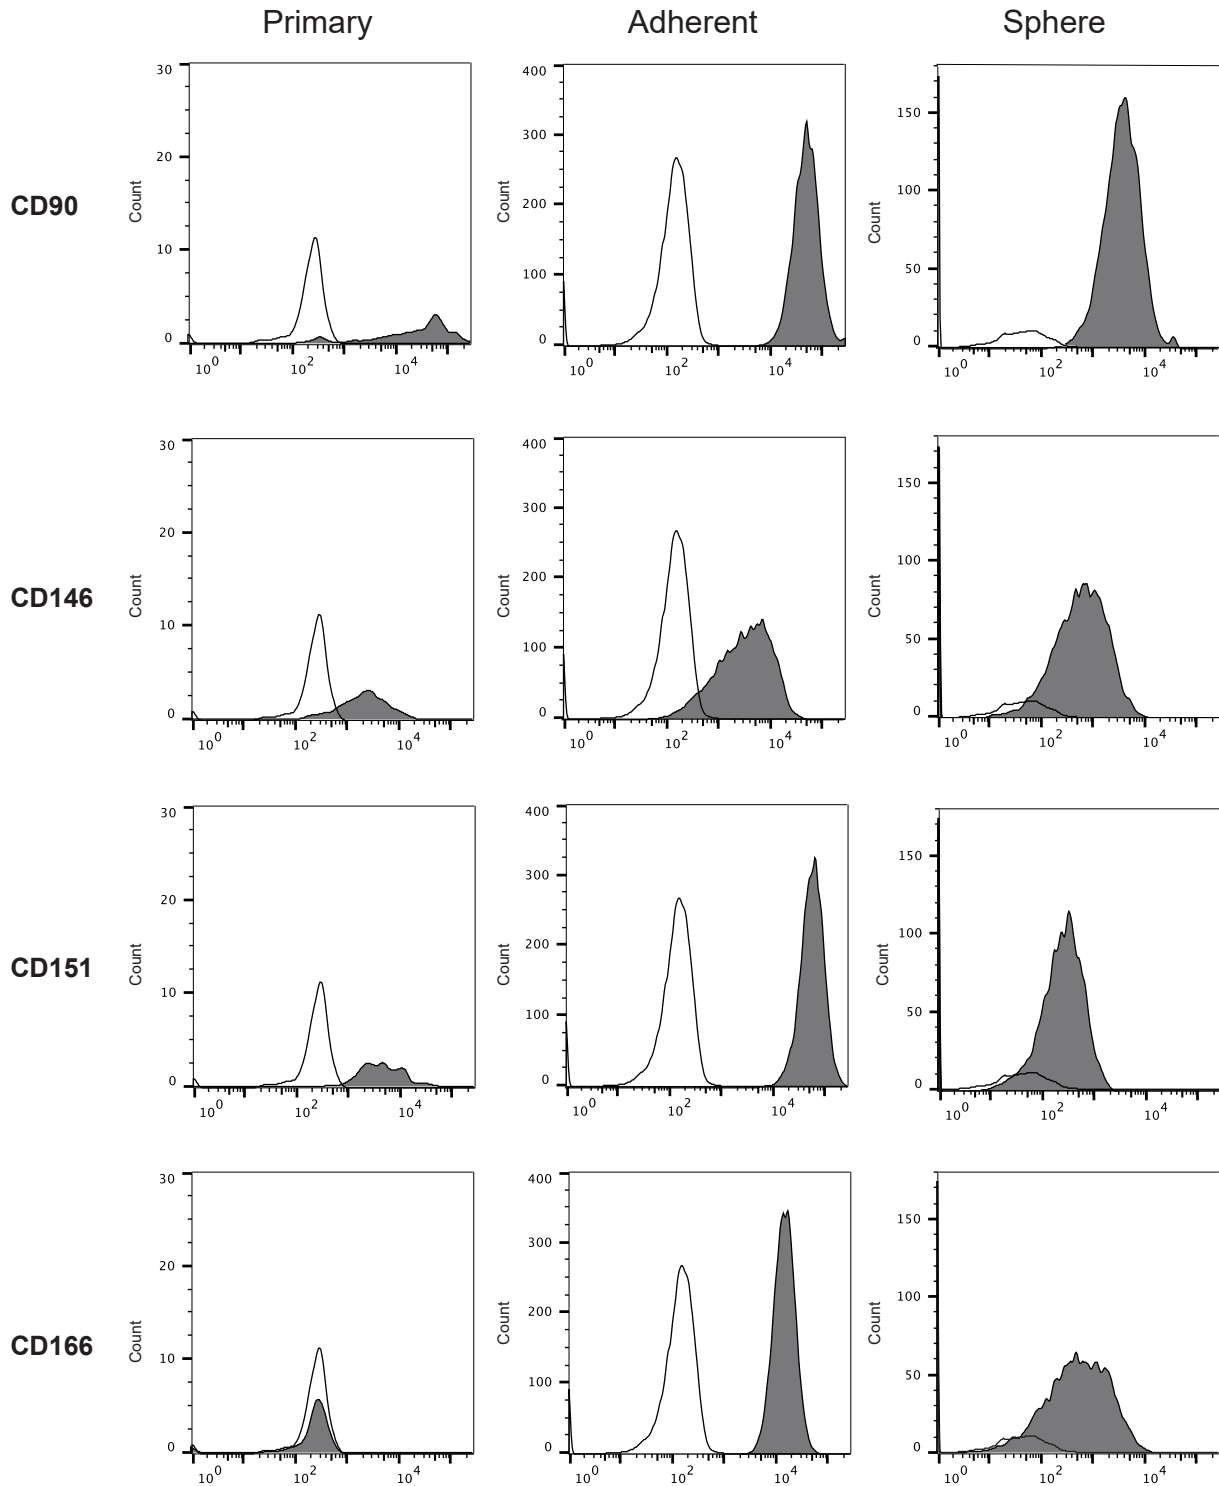

**Supplementary Figure S1.** Freshly isolated primary, and adherent and non-adherent (sphere) culture-expanded BM-MSCs (passage 3) were stained with antibodies against CD90, CD146, CD151 and CD166. A representative set of surface marker histograms (log scale) from a total of three independent experiments are shown in closed histograms. Corresponding isotype controls are indicated in open histograms.
